# Supplementary material for: Multicenter Cohort Study of Ceftaroline Versus Daptomycin for Treatment of Methicillin-Resistant Staphylococcus aureus Bloodstream Infection
Source: PubMed Central journal article supplement — Open Forum Infect Dis. 2021 Dec 23;9(3):ofab606. doi: 10.1093/ofid/ofab606 (PMC8825758; doi:10.1093/ofid/ofab606), 2021-12-23
Supplement: ofab606_suppl_supplementary_tables.pdf [file ofab606_suppl_supplementary_tables.pdf]

**TABLES**

**Supplemental Table 1.** Univariate description of demographic, clinical characteristics, and outcomes of included patients

| <b>Covariate</b>                                | <b>Observed Data<br/>(n = 270)</b> |
|-------------------------------------------------|------------------------------------|
| <b>Demographics</b>                             |                                    |
| Age (years)                                     | 58 (46 – 66.5)                     |
| Male                                            | 175 (64.8)                         |
| Race                                            |                                    |
| African American                                | 142 (52.6)                         |
| Caucasian                                       | 114 (42.2)                         |
| Asian                                           | 4 (1.5)                            |
| Hispanic                                        | 2 (0.7)                            |
| Other/unknown                                   | 8 (3.0)                            |
| Study Site                                      |                                    |
| Detroit Medical Center                          | 134 (49.6)                         |
| UF Health – Shands Hospital                     | 35 (13.0)                          |
| Henry Ford Hospital                             | 30 (11.1)                          |
| University of Tennessee Medical Center          | 17 (6.3)                           |
| Lee Memorial Hospital                           | 16 (5.9)                           |
| University of Maryland Medical Center           | 13 (4.8)                           |
| VA San Diego Healthcare System                  | 11 (4.1)                           |
| Huntsville Hospital                             | 9 (3.3)                            |
| HonorHealth John C. Lincoln Medical Center      | 3 (1.1)                            |
| Our Lady of the Lake Regional Medical Center    | 2 (0.7)                            |
| <b>Comorbidities &amp; Past Medical History</b> |                                    |
| Myocardial infarction                           | 28 (10.4)                          |
| Heart failure                                   | 65 (24.1)                          |
| Peripheral vascular disease                     | 45 (16.7)                          |
| Cerebrovascular disease                         | 35 (13.0)                          |
| Dementia                                        | 11 (4.1)                           |
| Chronic pulmonary disease                       | 57 (21.1)                          |
| Chronic obstructive pulmonary disease           | 41 (15.2)                          |
| Asthma                                          | 22 (8.1)                           |
| Connective tissue disease                       | 29 (10.7)                          |
| Peptic ulcer disease                            | 0                                  |
| Liver disease                                   | 57 (21.1)                          |
| Mild <sup>b</sup>                               | 47 (17.4)                          |

| <b>Covariate</b>                             | <b>Observed Data<br/>(n = 270)</b> |
|----------------------------------------------|------------------------------------|
| Moderate/severe <sup>c</sup>                 | 10 (3.7)                           |
| Diabetes                                     | 104 (38.5)                         |
| Without end-organ damage                     | 27 (10.0)                          |
| With end-organ damage                        | 77 (28.5)                          |
| Hemiplegia                                   | 9 (3.3)                            |
| Moderate/severe renal disease <sup>d</sup>   | 108 (40.0)                         |
| Chronic hemodialysis                         | 54 (20.0)                          |
| Solid tumor without metastasis               | 8 (3.0)                            |
| Leukemia                                     | 4 (1.5)                            |
| Lymphoma                                     | 1 (0.4)                            |
| Metastatic solid tumor                       | 4 (1.5)                            |
| Human immunodeficiency virus                 | 9 (3.3)                            |
| Acquired immune deficiency syndrome          | 2 (0.7)                            |
| Charlson comorbidity index                   | 2.5 (1.0 – 5.0)                    |
| Intravenous drug use                         | 65 (24.1)                          |
| Prior hospitalization (90 days)              | 101 (37.4)                         |
| Prior MRSA infection (1 year)                | 71 (26.3)                          |
| Prior IV vancomycin (90 days)                | 47 (17.4)                          |
| Prior daptomycin (90 days)                   | 27 (10.0)                          |
| Prior ceftaroline (90 days)                  | 3 (1.1)                            |
| <b>Clinical Data</b>                         |                                    |
| Admitted from                                |                                    |
| Home                                         | 203 (75.2)                         |
| Transferred from another hospital            | 34 (12.6)                          |
| Nursing facility                             | 32 (11.9)                          |
| Weight (kg)                                  | 81.4 (68.5 – 97.0)                 |
| Body mass index (kg/m <sup>2</sup> )         | 26.7 (23.5 – 32.5)                 |
| Obesity <sup>e</sup>                         | 89 (33.0)                          |
| Creatinine clearance <sup>f,g</sup> (mL/min) | 61.7 (36.5 – 96.1)                 |
| > 50 mL/min                                  | 136 (50.4)                         |
| 30.01 - 50 mL/min                            | 44 (16.3)                          |
| 15 - 30 mL/min                               | 30 (11.1)                          |
| < 15 mL/min or ESRD                          | 60 (22.2)                          |
| Acute kidney injury <sup>g</sup>             | 90 (33.3)                          |
| APACHE II score <sup>g</sup>                 | 14.0 (9.0 – 19.0)                  |

| <b>Covariate</b>                           | <b>Observed Data<br/>(n = 270)</b> |
|--------------------------------------------|------------------------------------|
| Neutropenia <sup>g</sup>                   | 4 (1.5)                            |
| <b>Infection Data</b>                      |                                    |
| Endovascular                               | 94 (34.8)                          |
| Infective endocarditis                     | 82 (30.4)                          |
| Other endovascular                         | 13 (4.8)                           |
| Intra-abdominal                            | 6 (2.2)                            |
| Lower respiratory tract                    | 0                                  |
| Bone/joint                                 | 84 (31.1)                          |
| Invasive prosthetic device                 | 24 (8.9)                           |
| Skin/soft tissue                           | 55 (20.4)                          |
| Deep tissue abscess                        | 22 (8.1)                           |
| Intravenous catheter                       | 52 (19.3)                          |
| Urinary                                    | 6 (2.2)                            |
| Unknown                                    | 13 (4.8)                           |
| <b>Treatment Data</b>                      |                                    |
| Infectious diseases consult                | 255 (94.4)                         |
| Source control pursued                     | 133 (49.3)                         |
| Study drug line of therapy                 |                                    |
| 1 <sup>st</sup> line                       | 78 (28.9)                          |
| 2 <sup>nd</sup> line                       | 188 (69.6)                         |
| 3 <sup>rd</sup> line                       | 4 (1.5)                            |
| Preceding MRSA BSI Therapy                 |                                    |
| Vancomycin                                 | 181 (67.0)                         |
| Daptomycin                                 | 6 (2.2)                            |
| Ceftaroline                                | 1 (0.4)                            |
| Linezolid                                  | 9 (3.3)                            |
| Time to study drug (hours)                 | 43.0 (20.8 – 71.0)                 |
| Ceftaroline dose, n = 83                   |                                    |
| 600 mg                                     | 57 (68.7)                          |
| 400 mg                                     | 12 (14.5)                          |
| 300 mg                                     | 11 (13.3)                          |
| 200 mg                                     | 3 (3.6)                            |
| Ceftaroline dose interval, n = 83          |                                    |
| Every 8 hours                              | 35 (42.2)                          |
| Every 12 hours                             | 47 (56.6)                          |
| Every 24 hours                             | 1 (1.2)                            |
| Daptomycin dose mg                         | 600 (500 – 770)                    |
| Daptomycin dose mg/kg – actual body weight | 7.7 (6.1 – 9.3)                    |

| Covariate                                              | Observed Data<br>(n = 270) |
|--------------------------------------------------------|----------------------------|
| Daptomycin dose mg/kg – adjusted body weight           | 8.5 (6.9 – 10.1)           |
| Daptomycin dose interval                               |                            |
| Every 24 hours                                         | 120 (64.2)                 |
| Every 48 hours/post-hemodialysis                       | 67 (35.8)                  |
| Inpatient study drug duration (days)                   | 9.5 (6.0 – 16.0)           |
| <b>Outcomes</b>                                        |                            |
| Composite treatment failure                            | 100 (37.0)                 |
| 30-day mortality                                       | 32 (11.9)                  |
| BSI duration ≥ 7 days                                  | 50 (18.5)                  |
| 60-day MRSA BSI recurrence                             | 38 (14.1)                  |
| 60-day readmission                                     | 97 (35.9)                  |
| MRSA BSI-related                                       | 23 (8.5)                   |
| BSI duration (days)                                    | 5.0 (4.0 – 8.0)            |
| Post-study drug initiation BSI duration (days)         | 3.0 (2.0 – 5.25)           |
| LOS                                                    | 15.0 (10.8 – 24.0)         |
| LOS post-BSI onset (days)                              | 14.0 (9.0 – 21.3)          |
| LOS post-study drug initiation (days)                  | 12.0 (7.0 – 20.0)          |
| Adverse drug reaction <sup>h</sup>                     | 41 (15.2)                  |
| Acute kidney injury                                    | 3 (1.1)                    |
| Neutropenia <sup>i</sup>                               | 0                          |
| Thrombocytopenia                                       | 6 (2.2)                    |
| Rash                                                   | 11 (4.1)                   |
| Creatine phosphokinase elevation <sup>j</sup>          | 10 (3.7)                   |
| <i>Clostridioides difficile</i> infection <sup>k</sup> | 7 (2.6)                    |

Abbreviations: IV, intravenous; MRSA, methicillin-resistant *Staphylococcus aureus*; APACHE, acute physiology and chronic health evaluation; BSI, bloodstream infection; LOS, length of stay,

<sup>a</sup> Data presented as number (percentage) or median (interquartile range)

<sup>b</sup> Mild liver disease defined as chronic hepatitis without cirrhosis

<sup>c</sup> Severe liver disease defined as portal hypertension or cirrhosis

<sup>d</sup> Moderate/severe renal disease defined as chronic kidney disease stage 3 or greater or receiving chronic dialysis

<sup>e</sup> Calculated using cockroft-gault formula using actual body weight for body mass index < 30 and adjusted body weight for body mass index > 30

<sup>f</sup> Calculated using cockroft-gault formula using actual body weight for body mass index < 30 and adjusted body weight for body mass index > 30

<sup>g</sup> At time of index MRSA blood culture

<sup>h</sup> Includes CPK elevation, neutropenia, rash Clostridioides difficile infection, acute kidney injury, thrombocytopenia (data presented on in table) and additional adverse reactions occurring while on study drug or attributed to study drug by treating clinicians such as, fever, hypotension & bradycardia, and eosinophilic pneumonia.

<sup>i</sup> decrease in absolute neutrophil count (ANC) to < 1,500 cells/mm<sup>3</sup> or ≥ 50% decline from initiation of study medication if baseline ANC < 1,500 cells/mm<sup>3</sup>

<sup>j</sup> increase to > 600 U/L or > 1,000 U/L if baseline CPK > 200 U/L

<sup>k</sup> Clostridioides difficile infection defined as signs/symptoms along with positive laboratory test at least 48 hours after initiation of study drug

**Supplemental Table 2.** Actual and inverse probability of treatment weighted risk differences between daptomycin and ceftaroline for the composite treatment failure in *post hoc* subgroup analysis by line of therapy

| Group                                       | Daptomycin    | Ceftaroline  | Risk difference (95% CI) | P value <sup>a</sup> | Weighted Risk difference (95% CI) | P value <sup>b</sup> |
|---------------------------------------------|---------------|--------------|--------------------------|----------------------|-----------------------------------|----------------------|
| Study therapy 1 <sup>st</sup> line, n = 78  | 25/62 (40.3)  | 7/16 (43.8)  | -3.4 (-23.8 – 30.6)      | 0.804                | -6.4 (-22.0 – 34.7)               | 0.658                |
| Study therapy 2 <sup>nd</sup> line, n = 188 | 47/124 (37.9) | 20/64 (31.3) | 6.7 (-20.1 – 7.6)        | 0.367                | 8.0 (-5.7 – 21.7)                 | 0.263                |
| Study therapy 3 <sup>rd</sup> line, n = 4   | 1/1 (100)     | 0/3 (0)      | -                        | -                    | -                                 | -                    |

CI, confidence interval

<sup>a</sup> P value for  $\chi^2$  or Fisher's exact test of actual risk differences

<sup>b</sup> P value for  $\chi^2$  test of weighted risk differences
